# Supplementary material
Source: publisher figshare collection journal article supplement (https://acs.figshare.com/ndownloader/files/3810778)
Supplement: Supplementary file 1 [file 3810778]

**Superconductivity in single crystals of  $\text{Lu}_3\text{T}_4\text{Ge}_{13-x}$  ( $T = \text{Co, Rh, Os}$ ) and  
 $\text{Y}_3\text{T}_4\text{Ge}_{13-x}$  ( $T = \text{Ir, Rh, Os}$ )  
Supporting Information (SI)**

Binod K. Rai<sup>†</sup>, Iain W. H. Oswald<sup>‡</sup>, Jiakui K. Wang<sup>†</sup>, Gregory T. McCandless<sup>‡</sup>, Julia Y. Chan<sup>‡</sup> and E. Morosan<sup>\*†</sup>

<sup>†</sup>*Department of Physics and Astronomy, Rice University, Houston, TX 77005, United States*

<sup>‡</sup>*Department of Chemistry, University of Texas at Dallas, Richardson, Texas 75080, United States*

(Dated: March 19, 2015)

\*E-mail address: emorosan@rice.edu

Tel: (713)-348-2529

## I. ADP RATIO CALCULATIONS

The equation used to determine each materials' ADP ratio is given by:  $\text{ADP ratio} = U_{eq}(2a)/U_{eq}(T)$  where  $U_{eq}(2a)$  is the displacement parameter for the atom located at Wyckoff site  $2a$ , and  $U_{eq}(T)$  is the displacement parameter for the transition metal element located at Wyckoff site  $8e$ . In the case of displacement parameters in literature being reported in  $B_{iso}$  or  $B_{eq}$  rather than  $U_{eq}$ , the following equation was used to relate  $B_{iso/eq}$  to  $U_{eq}$ :  $B_{iso/eq} = 8\pi^2(U_{eq})$ .

## II. PHYSICAL PROPERTIES MEASUREMENTS

The specific heat  $C_p(T)$  for  $\text{Lu}_3\text{T}_4\text{Ge}_{13-x}$  ( $T = \text{Co, Rh, Os}$ ) and  $\text{Y}_3\text{Os}_4\text{Ge}_{13-x}$  measured in various applied magnetic fields (Fig. S1) confirms the superconducting ground state these compounds. As the magnetic field increases, the transition is suppressed below 0.4 K for  $H$  between 1.4 T and 3.4 T. Linear fits (dashed lines in Fig. S1e) of the normal state specific heat,  $C_p/T$  vs.  $T^2$ , for  $T > T_c$  yield very similar electronic and phonon specific heat coefficients  $\gamma_n \approx 5 - 8 \text{ mJ/molK}^2$  for the four compounds (Table S3). After subtracting the phonon contribution, the resulting  $H = 0$  electronic specific heat scaled by temperature  $C_e/T$  is plotted in Fig. 4. Equal entropy constructs (dashed lines) yield an estimate for the electronic specific heat jump at  $T_c$ ,  $\Delta C_e/\gamma T_c$  close to 1.43 for the two Os compounds (Fig. 4c-d), and smaller (close to 1) for the other two compounds (Fig. 4a-b).

When considering a residual electronic specific heat  $C_{e,0} = \gamma_0 T$  (as introduced in the main text),<sup>1</sup> the superconducting gap  $2\Delta(0)/k_B T_c$  can be estimated from the fit  $C_e = \gamma_0 T + T_c A e^{-\Delta(0)/k_B T}$ . These fits with  $T < 0.4 T_c$ , with an example shown as dashed lines in Fig. 4, yield  $2\Delta(0)/k_B T_c$  values between 2.95 and 3.12 (Table S3). The  $2\Delta(0)/k_B T_c$  values, smaller than the predicted BCS value of 3.53, suggest that these are weakly coupled superconductors. The above superconducting gap energy equation is valid for the fits much lower than  $T_c$ ,  $T \leq 0.4 T_c$ .<sup>2</sup> With the limited temperature range available below  $0.4 T_c$  in these compounds, it is very difficult to discern, from the  $C_e$  fits alone, whether impurity or multi-band superconducting effects are at play. Such a reduced energy gap ( $2\Delta(0)/k_B T_c = 1.7$ ) was also reported for single crystals of  $\text{Y}_3\text{Ru}_4\text{Ge}_{13}$ ,<sup>3</sup> an isostructural 3-4-13 compound with a similarly small specific heat jump at  $T_c$ . As the resistivity data shows (Fig. 5 main text), one more similarity with the  $\text{Y}_3\text{Ru}_4\text{Ge}_{13}$  is the semiconductor-like resistivity in the normal state, a common trait of the 3-4-13 germanide superconductors, but distinct from the good metal behavior in all other 3-4-13 superconductors.<sup>4,5</sup>

The temperature-dependent Hall coefficient  $R_H$  measured for  $H = 9 \text{ T}$  is shown in Fig. S2 for  $\text{Lu}_3\text{T}_4\text{Ge}_{13-x}$  ( $T = \text{Co, Rh, Os}$ ) and  $\text{Y}_3\text{Os}_4\text{Ge}_{13-x}$ .  $\text{Lu}_3\text{Rh}_4\text{Ge}_{13}$  (Fig. S2a) and  $\text{Y}_3\text{Os}_4\text{Ge}_{12.65}$  (Fig. S2d) show both types of

charge carriers, as demonstrated by the sign change of  $R_H$ . In  $\text{Lu}_3\text{Co}_4\text{Ge}_{13}$  (Fig. S2b) and  $\text{Lu}_3\text{Os}_4\text{Ge}_{12.53}$  (Fig. S2c)  $R_H$  is negative, indicating electron-like charge carrier only. The resulting carrier density  $n$  at  $T = 2 \text{ K}$  is  $n \approx 10^{19} - 10^{21} \text{ cm}^{-3}$ , suggesting low carrier densities in all four compounds. For the present 3-4-13 compounds,  $n$  is about two to three orders of magnitude smaller than that for good metal superconductors, *e.g.*  $\text{Sr}_3\text{Ir}_4\text{Sn}_{13}$ ,<sup>6</sup> but in-between the values for poor metals and highly doped semiconductors.<sup>7</sup> As the temperature decreases, a continuous loss of charge carriers is observed for all compounds, as the absolute values  $|R_H|$  (not shown) decrease for most of the measured temperature range. The temperature dependence of  $n$  is therefore consistent with the resistivity measurements (Fig. 5, main text), since  $\rho(T)$  increases as the temperature decreases for all four compounds. Such behavior is also reported in  $\text{Y}_3\text{Ru}_4\text{Ge}_{13}$ .<sup>3,8</sup>

The superconducting critical field  $H_c$  as a function of temperature is shown in the  $H$ - $T$  phase diagrams (Fig. S3). The phase diagram contains  $T_c$  and  $H_c$  values from specific heat (triangles), resistivity (circles) and magnetization (squares) measurements. The upper critical field  $H_{c2}(0)$  is estimated from the  $H_{c2}$  fits to  $H_{c2}(T) = H_{c2}(0)[(1 - t^2)/(1 + t^2)]$  with  $t = T/T_c$ .<sup>9</sup> The resulting  $H_{c2}(0)$  values are listed in Table S3. The  $T = 0$  Ginzburg-Landau coherence length  $\xi(0)$  can be approximated using the estimated upper critical fields,  $H_{c2}(0) = \phi_0/2\pi \xi_0^2(0)$  where  $\phi_0 = h/2e$  is the flux quantum. The calculated coherence lengths  $\xi_0(0)$  are also listed in Table S3. Similar magnitudes of coherence lengths were reported for the stannide family as well.<sup>9,10,12</sup> The thermodynamic critical field  $H_c(0)$  and  $\kappa(0)$  can be estimated using the expressions  $H_c(0) = 4.23 \gamma_n^{1/2} T_c$  and  $\kappa(0) = \frac{H_{c2}(0)}{\sqrt{2}H_c(0)}$ ,<sup>13,14</sup> and are listed in the Table S3. The  $\kappa(0) \sim 700 \gg \frac{1}{\sqrt{2}}$  indicates that these are type II superconductors.

TABLE S1: Calculated ADP ratios

| Compound                                     | $B_{iso/eq}(2a)$ | $B_{iso/eq}(T)$ | $U_{iso/eq}(2a)$ | $U_{iso/eq}(T)$ | ADP ratio |
|----------------------------------------------|------------------|-----------------|------------------|-----------------|-----------|
| $\text{Lu}_3\text{Co}_4\text{Ge}_{13}$       | -                | -               | 0.0225           | 0.0050          | 4.5       |
| $\text{Lu}_3\text{Rh}_4\text{Ge}_{13}$       | -                | -               | 0.0215           | 0.0037          | 5.8       |
| $\text{Lu}_3\text{Os}_4\text{Ge}_{12.53}$    | -                | -               | 0.0320           | 0.0048          | 6.7       |
| $\text{Y}_3\text{Os}_4\text{Ge}_{12.65}$     | -                | -               | 0.0400           | 0.0050          | 8.0       |
| $\text{Y}_3\text{Ir}_4\text{Ge}_{13}$        | -                | -               | 0.0117           | 0.0009          | 13.2      |
| $\text{Y}_3\text{Rh}_4\text{Ge}_{12.93}$     | -                | -               | 0.0130           | 0.0008          | 16.2      |
| $\text{Yb}_3\text{Co}_4\text{Ge}_{13}$       | 0.65             | 0.69            | 0.0082           | 0.0087          | 0.9       |
| $\text{Yb}_3\text{Co}_{4.3}\text{Sn}_{12.7}$ | 1.80             | 1.39            | 0.0228           | 0.0176          | 1.3       |
| $\text{La}_3\text{Co}_4\text{Sn}_{13}$       | -                | -               | 0.0184           | 0.0113          | 1.6       |
| $\text{Ce}_3\text{Co}_4\text{Sn}_{13}$       | -                | -               | 0.0151           | 0.0085          | 1.8       |
| $\text{Yb}_3\text{Co}_4\text{Sn}_{13}$       | -                | -               | 0.0161           | 0.0064          | 2.5       |
| $\text{Yb}_3(\text{Co,Ru})_4\text{Ge}_{13}$  | -                | -               | 0.0137           | 0.0050          | 2.7       |

TABLE S2: Selected interatomic distances in  $\text{Lu}_3T_4\text{Ge}_{13-x}$  ( $T = \text{Co, Rh, Os}$ ) and  $\text{Y}_3\text{Os}_4\text{Ge}_{13-x}$ .

|                         | $\text{Lu}_3\text{Co}_4\text{Ge}_{13}$ | $\text{Lu}_3\text{Rh}_4\text{Ge}_{13}$ | $\text{Lu}_3\text{Os}_4\text{Ge}_{12.53}$ | $\text{Y}_3\text{Os}_4\text{Ge}_{12.65}$ |
|-------------------------|----------------------------------------|----------------------------------------|-------------------------------------------|------------------------------------------|
| <b>Ge icosahedron</b>   |                                        |                                        |                                           |                                          |
| Ge1-Ge2A (x12)          | 2.6615(54)                             | 2.6411(40)                             | 3.0448(113)                               | 3.0921(8)                                |
| Ge1-Ge2B (x12)          | 3.1484(31)                             | 3.2641(24)                             | 3.4823(556)                               | -                                        |
| <b>R cuboctahedron</b>  |                                        |                                        |                                           |                                          |
| R-Ge2A (x8)             | 3.2047(45)                             | 3.2493(37)                             | 3.1097(95)                                | 3.1337(12)                               |
| R-Ge2A (x4)             | 3.1100(61)                             | 3.2634(44)                             | 3.2015(141)                               | 3.1910(15)                               |
| R-Ge2B (x8)             | 2.9931(27)                             | 2.9966(21)                             | 3.0740(504)                               | -                                        |
| R-Ge2B (x4)             | 3.0377(43)                             | 3.1451(35)                             | 2.9950(771)                               | -                                        |
| <b>T trigonal prism</b> |                                        |                                        |                                           |                                          |
| T-Ge2A (x6)             | 2.3721(61)                             | 2.4544(46)                             | 2.4727(56)                                | 2.4790(17)                               |
| T-Ge2B (x6)             | 2.4050(35)                             | 2.4839(27)                             | 2.4766(322)                               | -                                        |

TABLE S3: Physical properties parameters of  $\text{Lu}_3T_4\text{Ge}_{13-x}$  ( $T = \text{Co, Rh, Os}$ ) and  $\text{Y}_3\text{Os}_4\text{Ge}_{12.7}$ 

| $R$ | $T$ | $T_c$<br>(K) | $\gamma_n$<br>( $\text{mJmol}^{-1}\text{K}^{-2}$ ) | $\beta$<br>( $\text{mJmol}^{-1}\text{K}^{-4}$ ) | $\text{DOS}(E_F)$<br>(states $\text{eV}^{-1}$ f.u. $^{-1}$ ) | $\gamma_{DFT}$<br>( $\text{mJmol}^{-1}\text{K}^{-2}$ ) | $\theta_D$<br>(K) | $\frac{\Delta C_e}{\gamma_n T_c}$ | $\frac{2\Delta(0)}{k_B T_c}$ | $H_{c2}(0)$<br>(T) | $\xi(0)$<br>(nm) | $H_c(0)$<br>(Oe) | $\kappa(0)$ |
|-----|-----|--------------|----------------------------------------------------|-------------------------------------------------|--------------------------------------------------------------|--------------------------------------------------------|-------------------|-----------------------------------|------------------------------|--------------------|------------------|------------------|-------------|
| Lu  | Co  | 1.40 (3)     | 5.35                                               | 0.301                                           | 6.70                                                         | 5.25                                                   | 506               | 1.02                              | 3.12                         | 2.10(6)            | 15.3             | 13.80            | 718         |
| Lu  | Rh  | 1.41(3)      | 5.19                                               | 0.299                                           | 6.40                                                         | 5.02                                                   | 505               | 1.07                              | 2.95                         | 1.98               | 12.9             | 20.23            | 692         |
| Lu  | Os  | 2.51(1)      | 8.55                                               | 0.406                                           | 7.17                                                         | 5.62                                                   | 537               | 1.48                              | 2.96                         | 3.20               | 10.1             | 31.04            | 729         |
| Y   | Os  | 2.03(3)      | 8.25                                               | 0.566                                           | 9.38                                                         | 7.35                                                   | 589               | 1.30                              | 3.02                         | 2.70               | 11.1             | 24.66            | 744         |

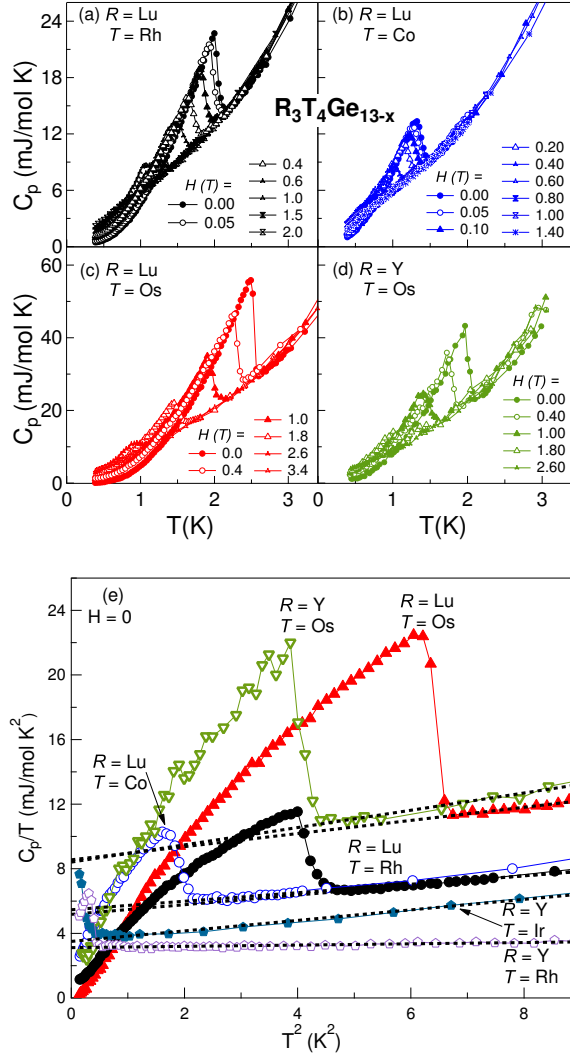

FIG. S1: Temperature-dependent specific heat for (a)  $R = \text{Lu}$  and  $T = \text{Rh}$ , (b)  $R = \text{Lu}$  and  $T = \text{Co}$ , (c)  $R = \text{Lu}$  and  $T = \text{Os}$ , and (d)  $R = \text{Y}$  and  $T = \text{Os}$ . (e)  $C_p/T$  vs.  $T^2$  plot with dotted lines representing linear fits just above  $T_c$ .

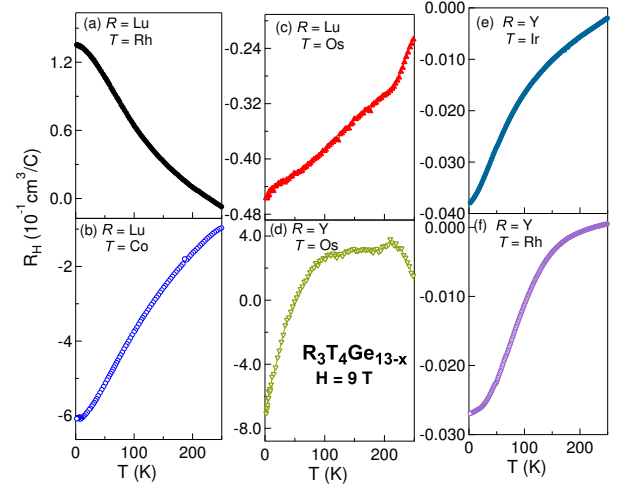

FIG. S2:  $H = 9 \text{ T}$  temperature-dependent (2-300 K) Hall coefficient  $R_H$  for  $R_3T_4\text{Ge}_{13-x}$ , with (a)  $R = \text{Lu}$  and  $T = \text{Rh}$ , (b)  $R = \text{Lu}$  and  $T = \text{Co}$ , (c)  $R = \text{Lu}$  and  $T = \text{Os}$ , (d)  $R = \text{Y}$  and  $T = \text{Os}$ , (e)  $R = \text{Y}$  and  $T = \text{Ir}$ , and (f)  $R = \text{Y}$  and  $T = \text{Rh}$ .

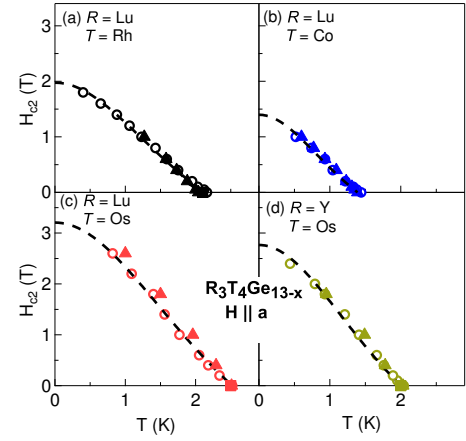

FIG. S3: The  $H - T$  phase diagram of  $\text{Lu}_3T_4\text{Ge}_{13-x}$  ( $T = \text{Co}, \text{Rh}, \text{Os}$ ) and  $\text{Y}_3\text{Os}_4\text{Ge}_{12.53}$ . The dashed line is a fit to  $H_{c2}(T) = H_{c2}(0)[(1 - t^2)/(1 + t^2)]$  with  $t = T/T_c$ . The points were determined from  $C_p(T)$  (triangles),  $\rho(T)$  (circles), and  $M(T)$  (squares).

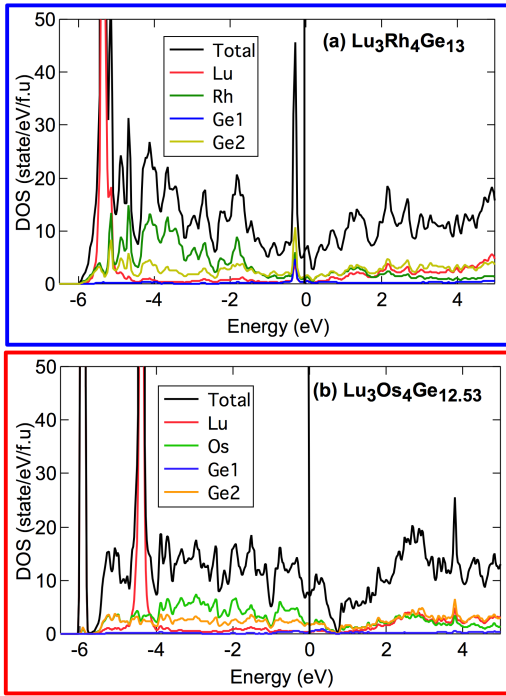

FIG. S4: DOS plots for (a)  $\text{Lu}_3\text{Rh}_4\text{Ge}_{13}$  without spin-orbit coupling (SOC) (b)  $\text{Lu}_3\text{Os}_4\text{Ge}_{12.53}$  with SOC. Total and partial DOS of Lu, T, Ge1 and Ge2 are black, red, green, blue, and orange, respectively. Fermi levels are marked by vertical lines.

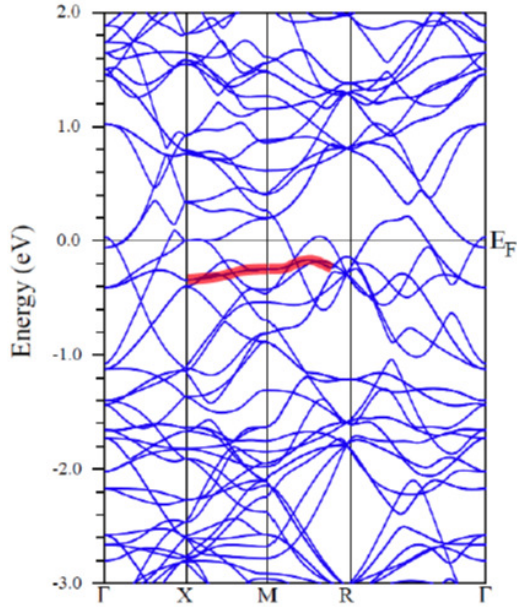

FIG. S5: Band structure plot for  $\text{Lu}_3\text{Rh}_4\text{Ge}_{13}$  with a flat band between -0.4 to -0.2 eV highlighted with a thick red curve.

### III. REFERENCES

- 
- <sup>1</sup> Gumeniuk, R.; Nicklas, M.; Akselrud, L.; Schnelle, W.; Schwarz, U.; Tsirlin, A. A.; Leithe-Jasper, A.; Grin, Yu *Phys. Rev. B* **2013**, *87*, 224502.
  - <sup>2</sup> Phillips, N. E. *Phys. Rev.* **1959**, *114*, 676.
  - <sup>3</sup> Prakash, O.; Thamizhavel, A.; Nigam, A.K.; Ramakrishnan, S. *Physica C* **2013**, *492*, 90.
  - <sup>4</sup> Ghosh, K.; Ramakrishnan, S.; Chandra, G. *Phys. Rev. B* **1993**, *48*, 10435.
  - <sup>5</sup> Singh Y.; Ramakrishnan, S. *Phys. Rev. B* **2004**, *69*, 174423.
  - <sup>6</sup> Kuo, C. N.; Liu, H. F.; Lue, C. S.; Wang, L. M.; Chen, C. C.; Kuo, Y. K. *Phys. Rev. B* **2014**, *89*, 094520.
  - <sup>7</sup> Snyder, G. J.; Toberer, E. S. *Nat. Matter.* **2008**, *7*, 105.
  - <sup>8</sup> Kong, H.; Shi, X.; Uher, C.; Morelli, D. T. *J. Appl. Phys.* **2007**, *102*, 023702.
  - <sup>9</sup> Slebarski, A.; Fijakowski, M.; Maska, M. M.; Mierzejewski, M.; White, B. D.; Maple, M. B. *Phys. Rev. B* **2014**, *89*, 125111.
  - <sup>10</sup> Mudryk, Y.; Grytsiv, A.; Rogl, P.; Dusek, C.; Galatanu, A.; Idl, E.; Michor, H.; Bauer, E.; Godart, C.; Kaczorowski, D.; Romaka, L. Bodak, O. *J. Phys.: Condens. Matter* **2001**, *13*, 7391.
  - <sup>11</sup> Kittel, C. *Introduction to Solid State Physics* 7th ed.; John Wiley and sons, New York, 2006.
  - <sup>12</sup> Kase, N.; Hayamizu, H.; Akimitsu, J. *Phys. Rev. B* **2011**, *83*, 184509.
  - <sup>13</sup> Orlando, T. P.; McNiff, E. J. Jr., Foner, S.; Beasley, M. R. *Phys. Rev. B* **1979**, *19*, 4545.
  - <sup>14</sup> Tinkham, M. *Introduction to Superconductivity* 2nd ed.; Dover, New Yourk, 1995.
